# Supplementary material for: Global cropland expansion enhances cropping potential and reduces its inequality among countries
Source: Copernicus journal article supplement (doi:10.5194/esd-15-817-2024), 2024-06-24
Supplement: Supplementary file 1 [file esd-15-817-2024-supplement.pdf]

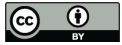

*Supplement of*

## **Global cropland expansion enhances cropping potential and reduces its inequality among countries**

**Xiaoxuan Liu et al.**

*Correspondence to:* Le Yu ([leyu@tsinghua.edu.cn](mailto:leyu@tsinghua.edu.cn))

The copyright of individual parts of the supplement might differ from the article licence.

1  
2

## Supplementary Information

**Table S1. Delineation of GCAM regions and their containing countries.**

| reg32_id | Continent     | Region                          | Country                                                                                                                                                                                                                                                                                                                                                                   |
|----------|---------------|---------------------------------|---------------------------------------------------------------------------------------------------------------------------------------------------------------------------------------------------------------------------------------------------------------------------------------------------------------------------------------------------------------------------|
| 1        | North America | USA                             | United States                                                                                                                                                                                                                                                                                                                                                             |
| 8        |               | Canada                          | Canada                                                                                                                                                                                                                                                                                                                                                                    |
| 9        |               | Central America and Caribbean   | Aruba, Anguilla, Netherlands Antilles, Antigua & Barbuda, Bahamas, Belize, Bermuda, Barbados, Costa Rica, Cuba, Cayman Islands, Dominica, Dominican Republic, Guadeloupe, Grenada, Guatemala, Honduras, Haiti, Jamaica, Saint Kitts and Nevis, Saint Lucia, Montserrat, Martinique, Nicaragua, Panama, El Salvador, Trinidad and Tobago, Saint Vincent and the Grenadines |
| 20       |               | Mexico                          | Mexico                                                                                                                                                                                                                                                                                                                                                                    |
| 7        |               | Brazil                          | Brazil                                                                                                                                                                                                                                                                                                                                                                    |
| 25       |               | South America_Northern          | French Guiana, Guyana, Suriname, Venezuela                                                                                                                                                                                                                                                                                                                                |
| 26       |               | South America_Southern          | Bolivia, Chile, Ecuador, Peru, Paraguay, Uruguay                                                                                                                                                                                                                                                                                                                          |
| 30       |               | Argentina                       | Argentina                                                                                                                                                                                                                                                                                                                                                                 |
| 31       |               | Colombia                        | Colombia                                                                                                                                                                                                                                                                                                                                                                  |
| 12       | Europe        | EU-12                           | Bulgaria, Cyprus, Czech Republic, Estonia, Hungary, Lithuania, Latvia, Malta, Poland, Romania, Slovakia, Slovenia                                                                                                                                                                                                                                                         |
| 13       |               | EU-15                           | Andorra, Austria, Belgium, Denmark, Finland, France, Germany, Greece, Greenland, Ireland, Italy, Luxembourg, Monaco, Netherlands, Portugal, Sweden, Spain, United Kingdom                                                                                                                                                                                                 |
| 14       |               | Europe_Eastern                  | Belarus, Moldova, Ukraine                                                                                                                                                                                                                                                                                                                                                 |
| 15       |               | Europe_Non_EU                   | Albania, Bosnia and Herzegovina, Croatia, Macedonia, Montenegro, Serbia, Turkey                                                                                                                                                                                                                                                                                           |
| 16       |               | European Free Trade Association | Iceland, Norway, Switzerland                                                                                                                                                                                                                                                                                                                                              |
| 2        | Africa        | Africa_Eastern                  | Burundi, Comoros, Djibouti, Eritrea, Ethiopia, Kenya, Madagascar, Mauritius, Reunion, Rwanda, Sudan, Somalia, Uganda                                                                                                                                                                                                                                                      |
| 3        |               | Africa_Northern                 | Algeria, Egypt, Western Sahara, Libya, Morocco, Tunisia                                                                                                                                                                                                                                                                                                                   |
| 4        |               | Africa_Southern                 | Angola, Botswana, Lesotho, Mozambique, Malawi, Namibia, Swaziland, Tanzania, Zambia, Zimbabwe                                                                                                                                                                                                                                                                             |
| 5        |               | Africa_Western                  | Benin, Burkina Faso, Central African Republic, Cote d'Ivoire, Cameroon, Democratic Republic of the Congo, Congo, Cape Verde, Gabon, Ghana, Guinea, Gambia, Guinea-Bissau,                                                                                                                                                                                                 |

|    |      |                |                                                                                                                                                                                                                                                                                                                                                                                                                                                                                                                                                                                    |                        |
|----|------|----------------|------------------------------------------------------------------------------------------------------------------------------------------------------------------------------------------------------------------------------------------------------------------------------------------------------------------------------------------------------------------------------------------------------------------------------------------------------------------------------------------------------------------------------------------------------------------------------------|------------------------|
|    |      |                | Equatorial Guinea, Liberia, Mali, Mauritania, Niger, Nigeria, Senegal, Sierra Leone, Sao Tome and Principe, Chad, Togo                                                                                                                                                                                                                                                                                                                                                                                                                                                             |                        |
| 24 |      | South Africa   | South Africa                                                                                                                                                                                                                                                                                                                                                                                                                                                                                                                                                                       |                        |
| 10 | Asia | Central Asia   | Armenia, Azerbaijan, Georgia, Kazakhstan, Kyrgyzstan, Mongolia, Tajikistan, Turkmenistan, Uzbekistan                                                                                                                                                                                                                                                                                                                                                                                                                                                                               |                        |
| 11 |      | China          | China                                                                                                                                                                                                                                                                                                                                                                                                                                                                                                                                                                              |                        |
| 17 |      | India          | India                                                                                                                                                                                                                                                                                                                                                                                                                                                                                                                                                                              |                        |
| 18 |      | Indonesia      | Indonesia                                                                                                                                                                                                                                                                                                                                                                                                                                                                                                                                                                          |                        |
| 19 |      | Japan          | Japan                                                                                                                                                                                                                                                                                                                                                                                                                                                                                                                                                                              |                        |
| 21 |      | Middle East    | United Arab Emirates, Bahrain, Iran, Iraq, Israel, Jordan, Kuwait, Lebanon, Oman, Palestine, Qatar, Saudi Arabia, Syria, Yemen                                                                                                                                                                                                                                                                                                                                                                                                                                                     |                        |
| 22 |      | Pakistan       | Pakistan                                                                                                                                                                                                                                                                                                                                                                                                                                                                                                                                                                           |                        |
| 23 |      | Russia         | Russia                                                                                                                                                                                                                                                                                                                                                                                                                                                                                                                                                                             |                        |
| 27 |      | South Asia     | Afghanistan, Bangladesh, Bhutan, Sri Lanka, Maldives, Nepal                                                                                                                                                                                                                                                                                                                                                                                                                                                                                                                        |                        |
| 28 |      | South Korea    | South Korea                                                                                                                                                                                                                                                                                                                                                                                                                                                                                                                                                                        |                        |
| 29 |      | Southeast Asia | American Samoa, Brunei Darussalam, Cocos (Keeling) Islands, Cook Islands, Christmas Island, Fiji, Federated States of Micronesia, Guam, Cambodia, Kiribati, Lao Peoples Democratic Republic, Marshall Islands, Myanmar, Northern Mariana Islands, Malaysia, Mayotte, New Caledonia, Norfolk Island, Niue, Nauru, Pacific Islands Trust Territory, Pitcairn Islands, Philippines, Palau, Papua New Guinea, Democratic People's Republic of Korea, French Polynesia, Singapore, Solomon Islands, Seychelles, Thailand, Tokelau, Timor Leste, Tonga, Tuvalu, Viet Nam, Vanuatu, Samoa |                        |
| 6  |      | Australia      | Australia_NZ                                                                                                                                                                                                                                                                                                                                                                                                                                                                                                                                                                       | Australia, New Zealand |

4 **Table S2. Correspondence between our new categories and legends used in HYDE**  
 5 **datasets.**

| Land Cover Type | legends used in HYDE datasets |                                      |
|-----------------|-------------------------------|--------------------------------------|
| Cropland        | 21                            | Village, Rice                        |
|                 | 22                            | Village, Irrigated                   |
|                 | 23                            | Village, Rainfed                     |
|                 | 31                            | Croplands, residential irrigated     |
|                 | 32                            | Croplands, residential rainfed       |
|                 | 33                            | Croplands, populated                 |
| Woodland        | 51                            | Semi-natural woodlands, residential  |
|                 | 52                            | Semi-natural woodlands, populated    |
|                 | 53                            | Semi-natural woodlands, remote       |
|                 | 61                            | Wild, remote - woodlands             |
| Grassland       | 24                            | Village, Pastoral                    |
|                 | 34                            | Croplands, pastoral                  |
|                 | 41                            | Rangeland, residential               |
|                 | 42                            | Rangeland, populated                 |
|                 | 43                            | Rangeland, remote                    |
| Ice             | 63                            | Wild, remote - ice                   |
| Urban           | 11                            | Urban                                |
|                 | 12                            | Dense settlements                    |
| Bareland        | 54                            | Semi-natural treeless & barren lands |
|                 | 62                            | Wild, remote - treeless & barren     |

6

7 **Table S3. Correspondence between our new categories and legends used in PV datasets.**

| Land Cover Type | legends used in PV datasets |                                                |                  |
|-----------------|-----------------------------|------------------------------------------------|------------------|
| Woodland        | 1                           | Tropical Evergreen Forest/Woodland             |                  |
|                 | 2                           | Tropical Deciduous Forest/Woodland             |                  |
|                 | 3                           | Temperate Broadleaf Evergreen Forest/Woodland  |                  |
|                 | 4                           | Temperate Needleleaf Evergreen Forest/Woodland |                  |
|                 | 5                           | Temperate Deciduous Forest/Woodland            |                  |
|                 | 6                           | Boreal Evergreen Forest/Woodland               |                  |
|                 | 7                           | Boreal Deciduous Forest/Woodland               |                  |
|                 | 8                           | Mixed Forest                                   |                  |
|                 | 11                          | Dense Shrubland                                |                  |
|                 | 12                          | Open Shrubland                                 |                  |
|                 | Grassland                   | 9                                              | Savanna          |
|                 |                             | 10                                             | Grassland/Steppe |
| 13              |                             | Tundra                                         |                  |
| Ice             | 63                          | Polar desert/Rock/Ice                          |                  |
| Bareland        | 54                          | Desert                                         |                  |

8

9 **Table S4. Delineation of climate cropping potential zones in the tropics.**

| <b>ZONE</b> | <b>PRE</b> | <b>LGP<sub>T=5</sub></b> | <b>LGP<sub>T=10</sub></b> | <b>TS<sub>T=0</sub></b> | <b>TS<sub>T=10</sub></b> | <b>LGP</b> | <b>TSG<sub>T=5</sub></b> | <b>TSG<sub>T=10</sub></b> |
|-------------|------------|--------------------------|---------------------------|-------------------------|--------------------------|------------|--------------------------|---------------------------|
| <b>0</b>    | <300       | <120                     | <90                       | <1600                   | <1000                    | <45        | <3200                    | <2700                     |
| <b>1</b>    | ≥300       | ≥120                     | ≥90                       | ≥1600                   | ≥1000                    | ≥45        | ≥3200                    | ≥2700                     |
| <b>2</b>    | ≥600       | ≥240                     | ≥165                      | ≥6400                   | ≥3600                    | ≥210       | ≥4000                    | ≥3200                     |
| <b>3</b>    | ≥1850      | ≥360                     | ≥360                      | ≥7200                   | ≥7000                    | ≥360       | ≥5100                    | ≥4800                     |

10

11 **Table S5. Delineation of cropping potential zones in subtropics and temperate zones.**

| <b>ZONE</b> | <b>PRE</b> | <b>LGP<sub>T=5</sub></b> | <b>LGP<sub>T=10</sub></b> | <b>TS<sub>T=0</sub></b> | <b>TS<sub>T=10</sub></b> | <b>LGP</b> | <b>TSG<sub>T=5</sub></b> | <b>TSG<sub>T=10</sub></b> |
|-------------|------------|--------------------------|---------------------------|-------------------------|--------------------------|------------|--------------------------|---------------------------|
| <b>0</b>    | <300       | <120                     | <90                       | <1600                   | <1000                    | <45        | <3200                    | <2900                     |
| <b>1</b>    | ≥300       | ≥120                     | ≥90                       | ≥1600                   | ≥1000                    | ≥45        | ≥3200                    | ≥2900                     |
| <b>2</b>    | ≥600       | ≥240                     | ≥165                      | ≥4500                   | ≥3600                    | ≥210       | ≥4000                    | ≥3200                     |
| <b>3</b>    | ≥1850      | ≥330                     | ≥270                      | ≥5700                   | ≥5500                    | ≥330       | ≥5100                    | ≥4800                     |

12

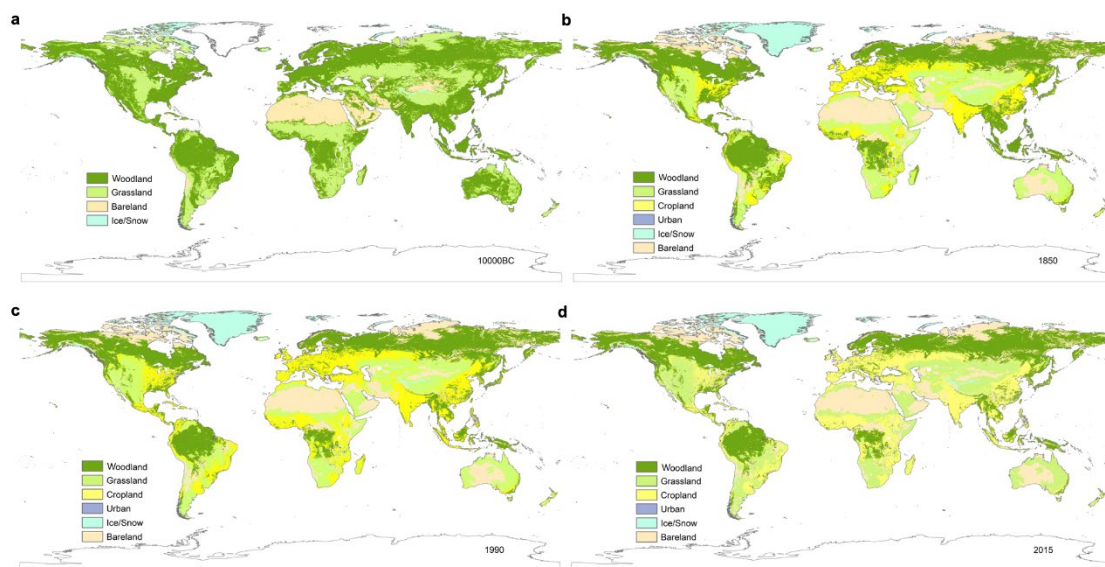

13  
14  
15

**Fig. S1.** HYDE data for (a) 10000BC, (b) 1850, (c) 1990 and (d) 2015.



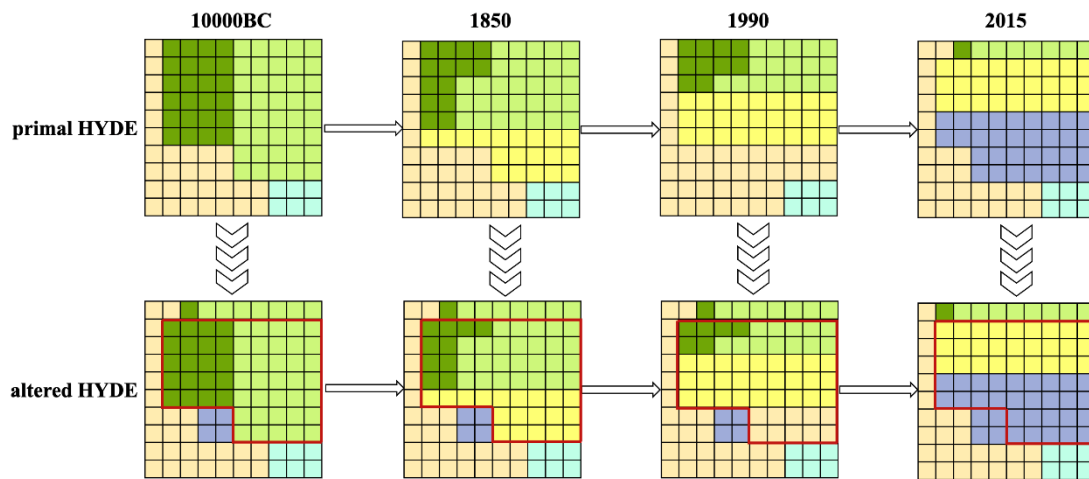

16  
17  
18  
19  
20

**Fig. S2.** The primal HYDE data and the altered HYDE data, which only keep areas (the red frame) with land cover changes in cropland and other areas of variation are set the same as the base year of 2015.

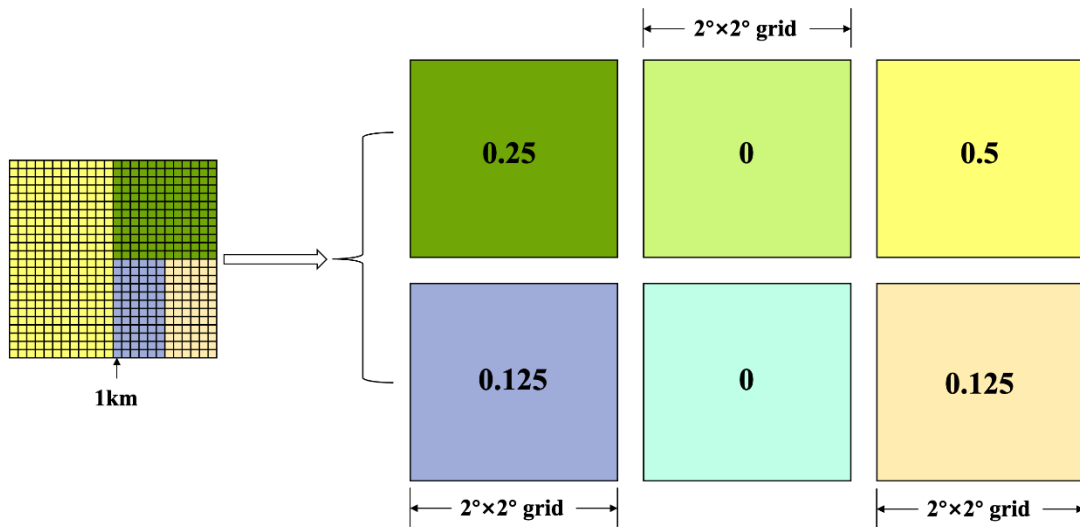

21  
22  
23

**Fig. S3.** The aggregate example from 1km to 2° grid cell.

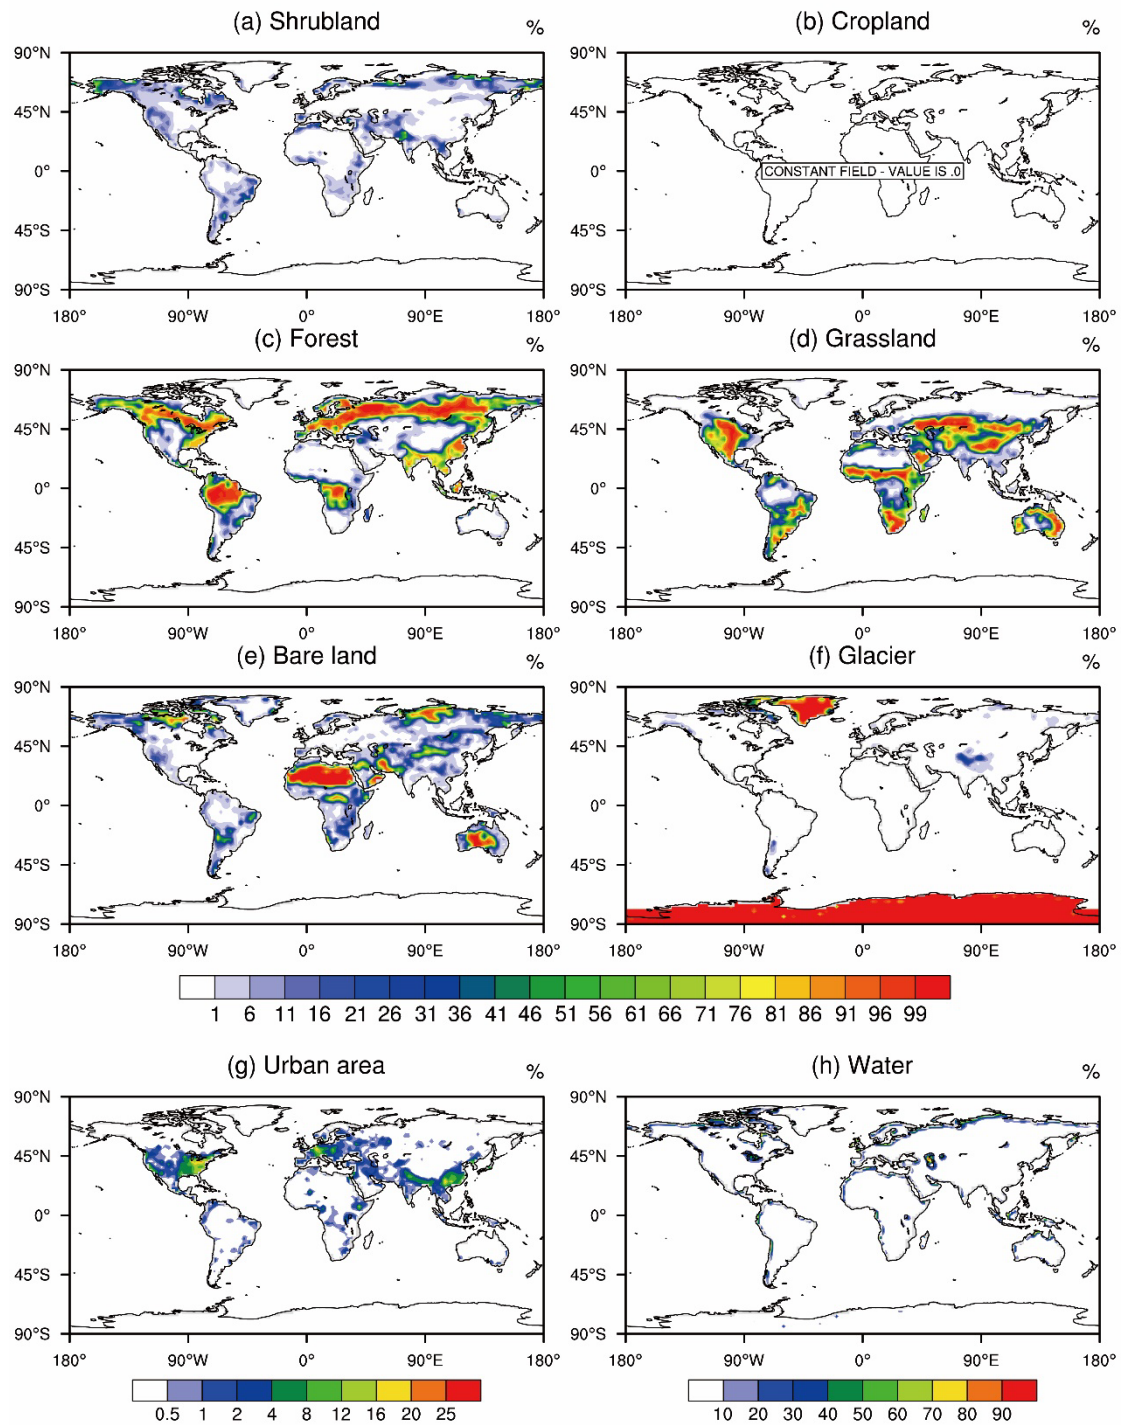

24  
25

Fig. S4. Land cover used in CESM for 10000BC.

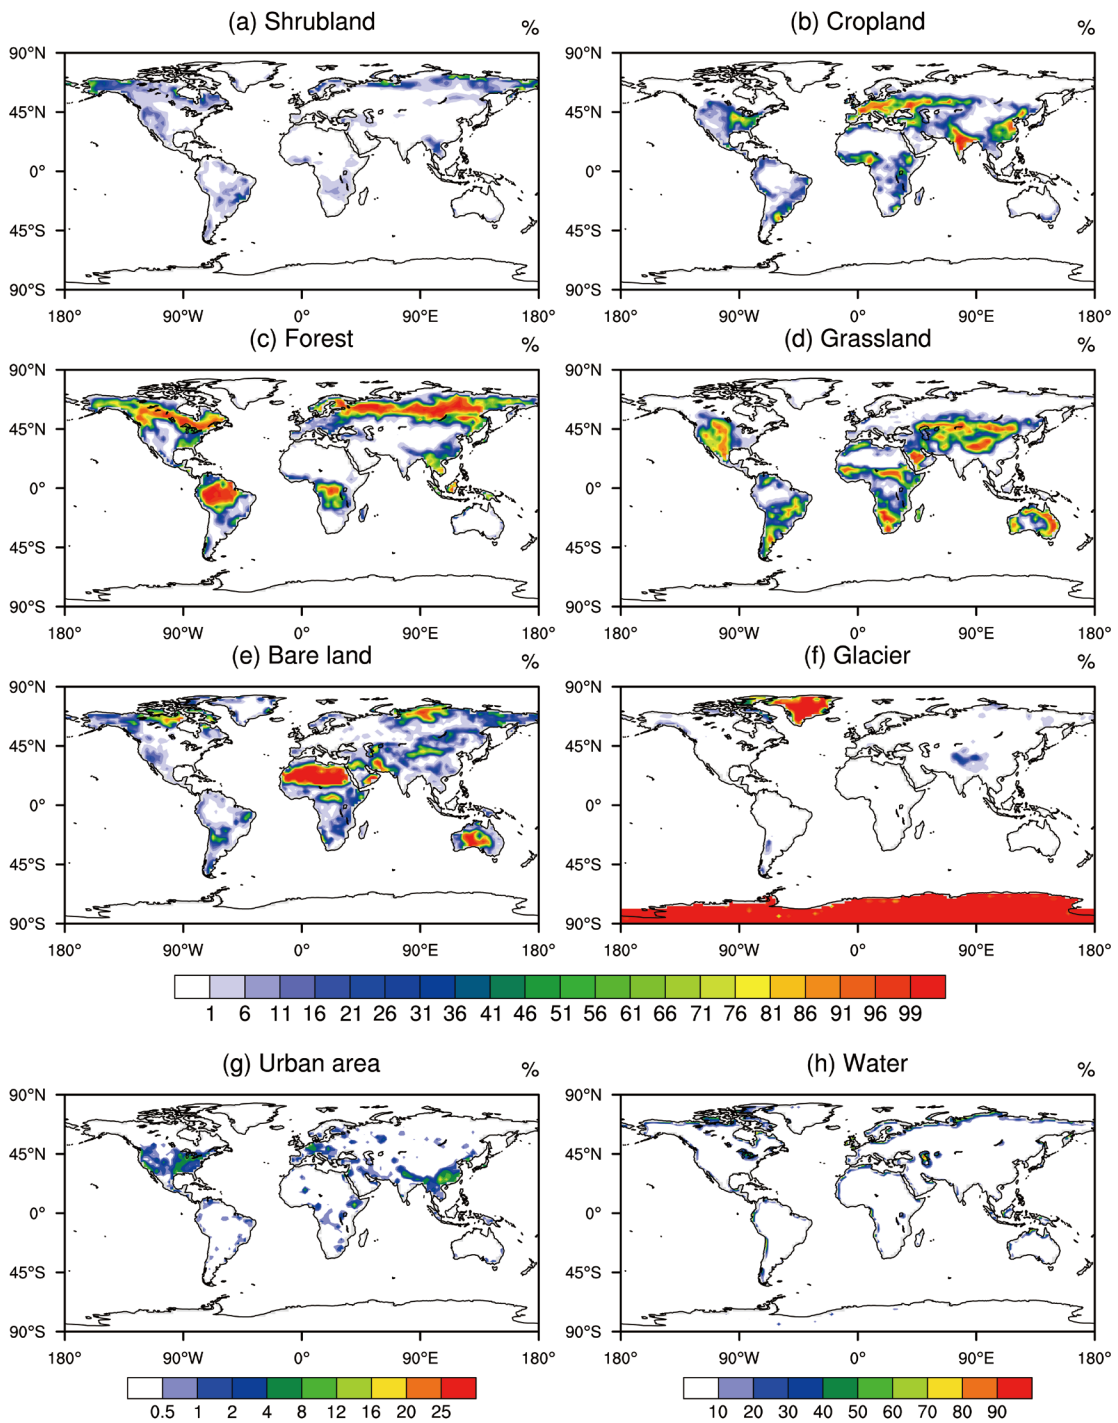

26  
27

Fig. S5. Land cover used in CESM for 1850.

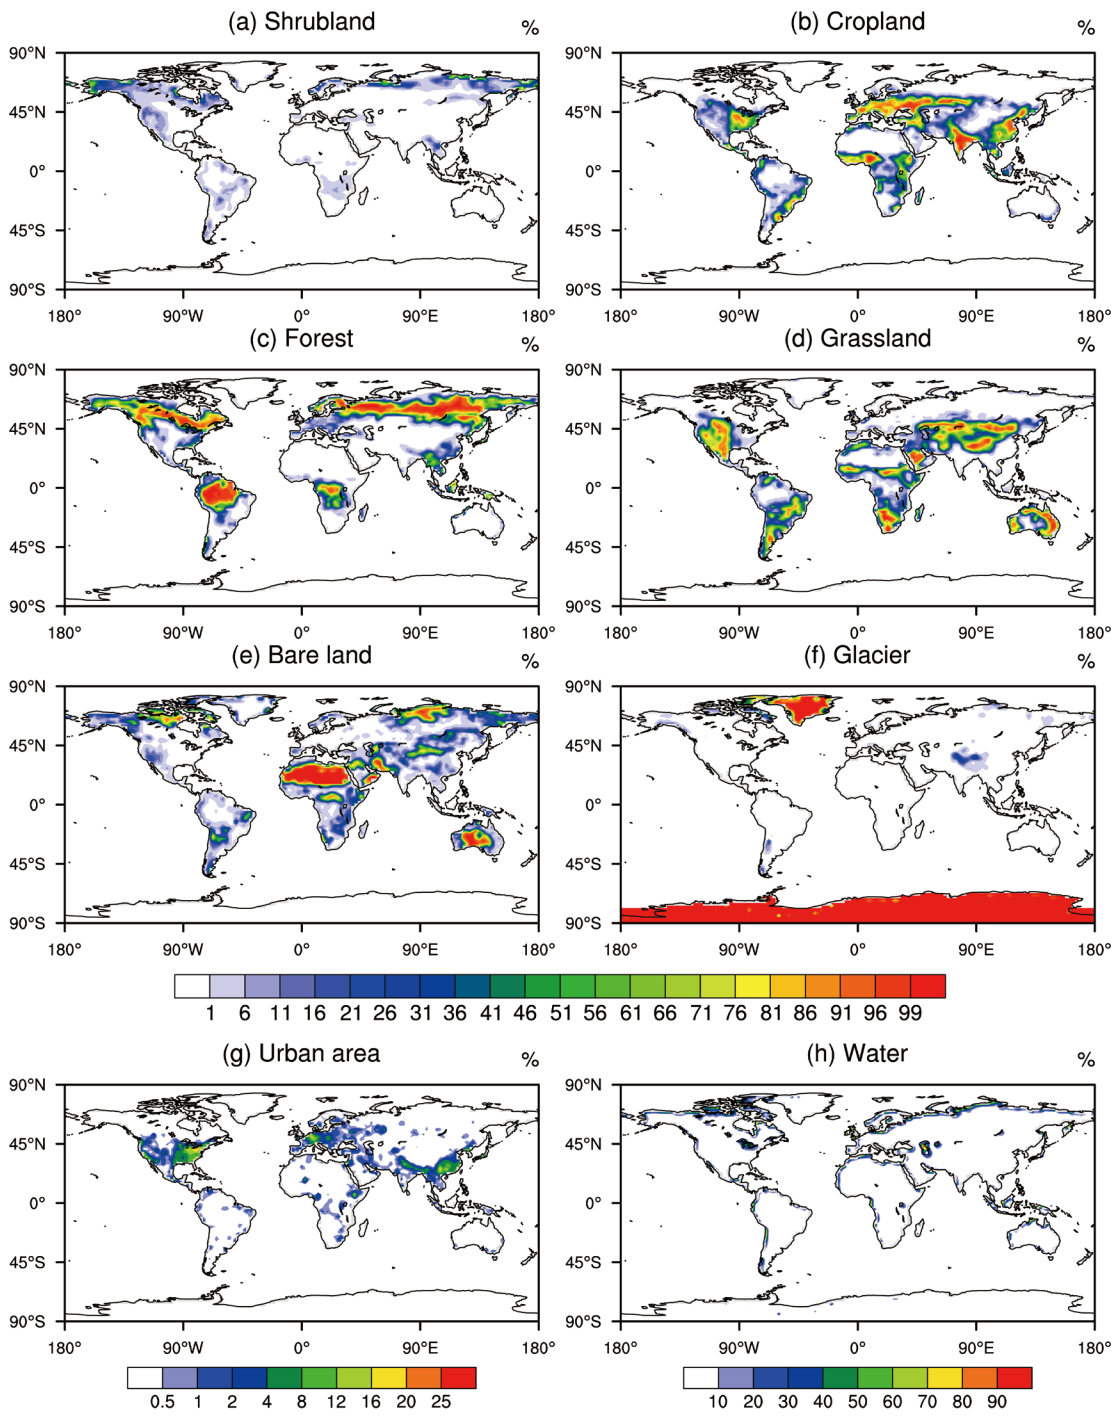

28  
29

Fig. S6. Land cover used in CESM for 1990.

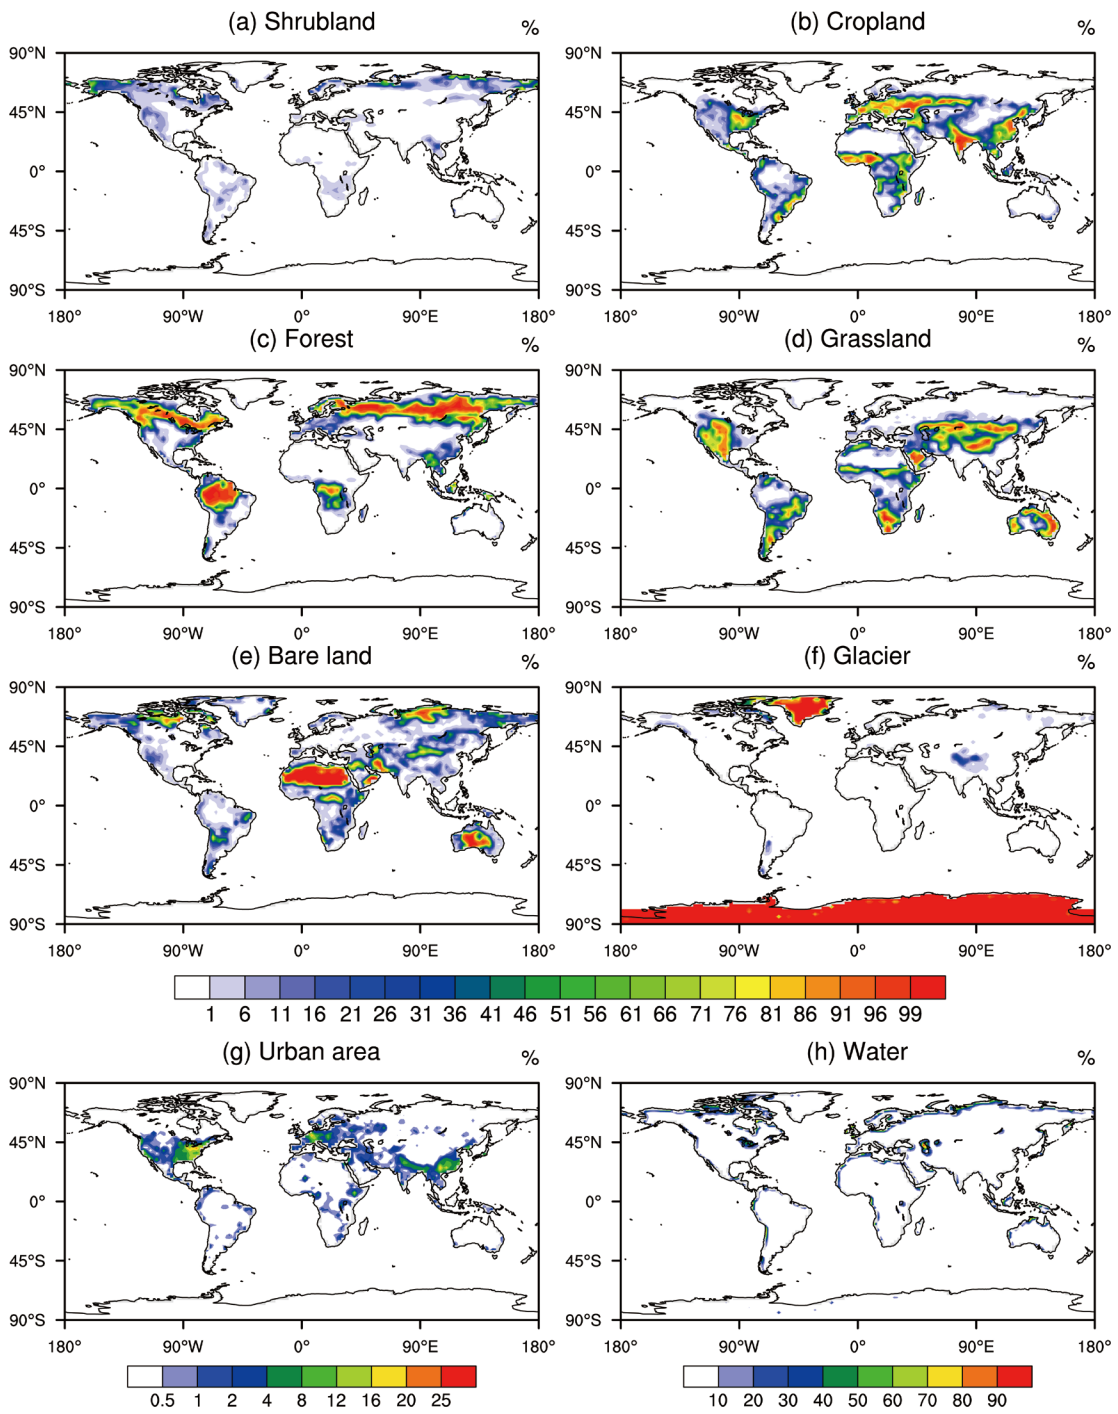

30  
31

**Fig. S7.** Land cover used in CESM for 2015.

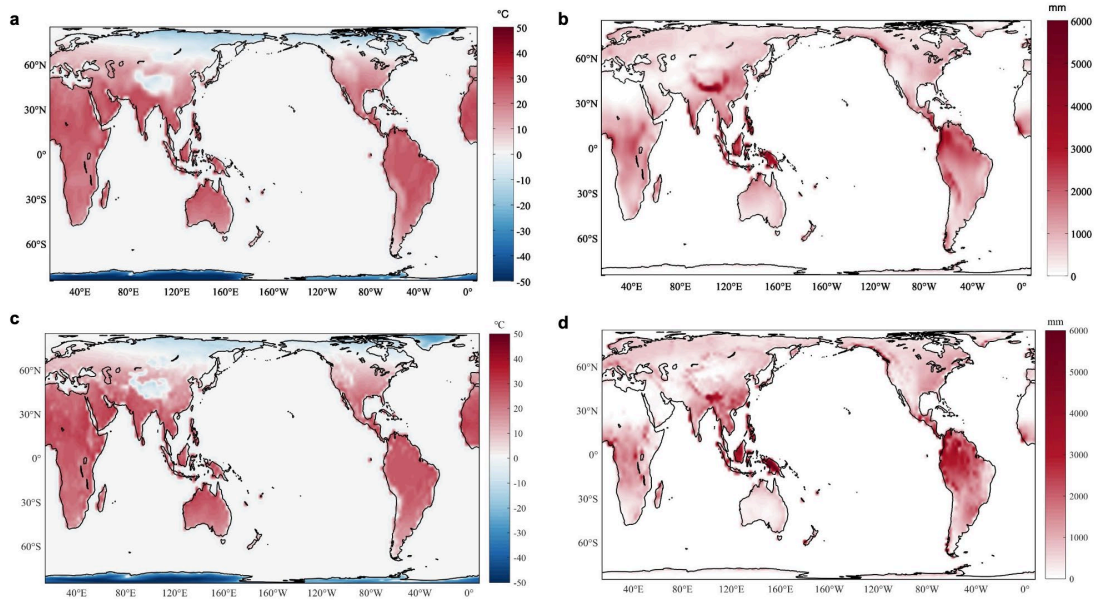

32  
 33  
 34  
 35

**Fig. S8.** Bias-corrected T and P in 10000BC based on ERA5. (a) uncorrected temperature (b) uncorrect precipitation (c) corrected temperature (d) corrected precipitation.

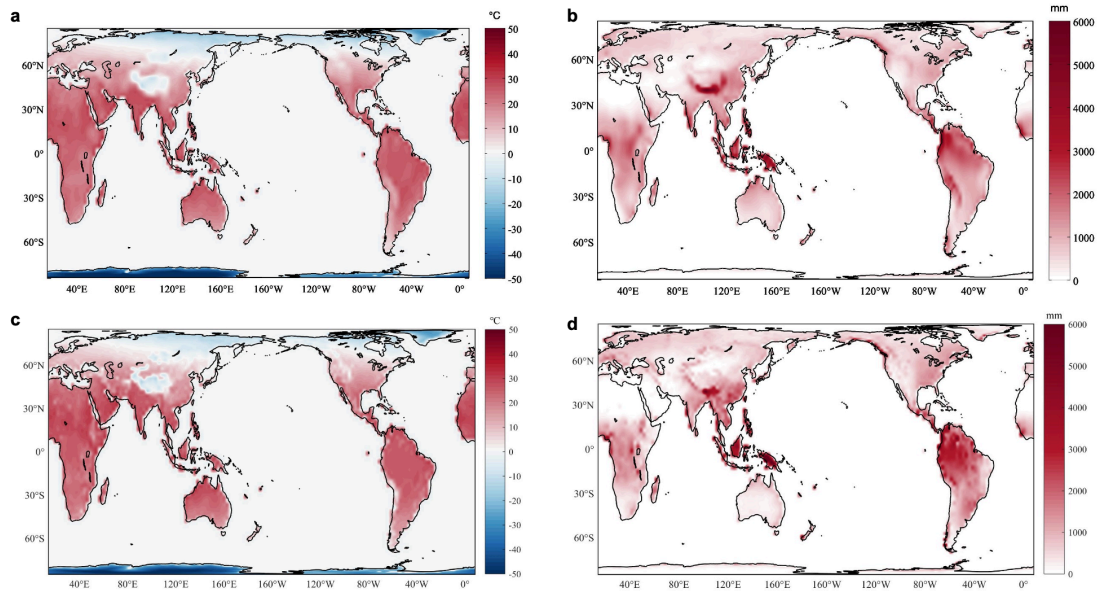

37

38

**Fig. S9.** Bias-corrected T and P in 1850 based on ERA5. (a) uncorrected temperature (b)

39

uncorrect precipitation (c) corrected temperature (d) corrected precipitation.

40



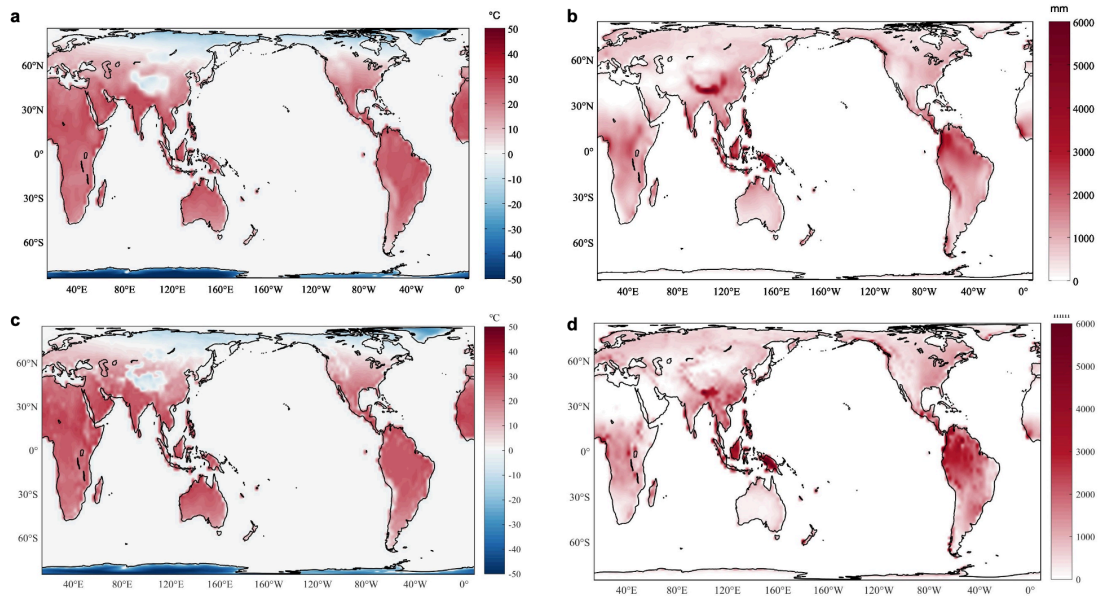

42

43

**Fig. S10.** Bias-corrected T and P in 1990 based on ERA5. (a) uncorrected temperature (b)

44

uncorrect precipitation (c) corrected temperature (d) corrected precipitation.

45

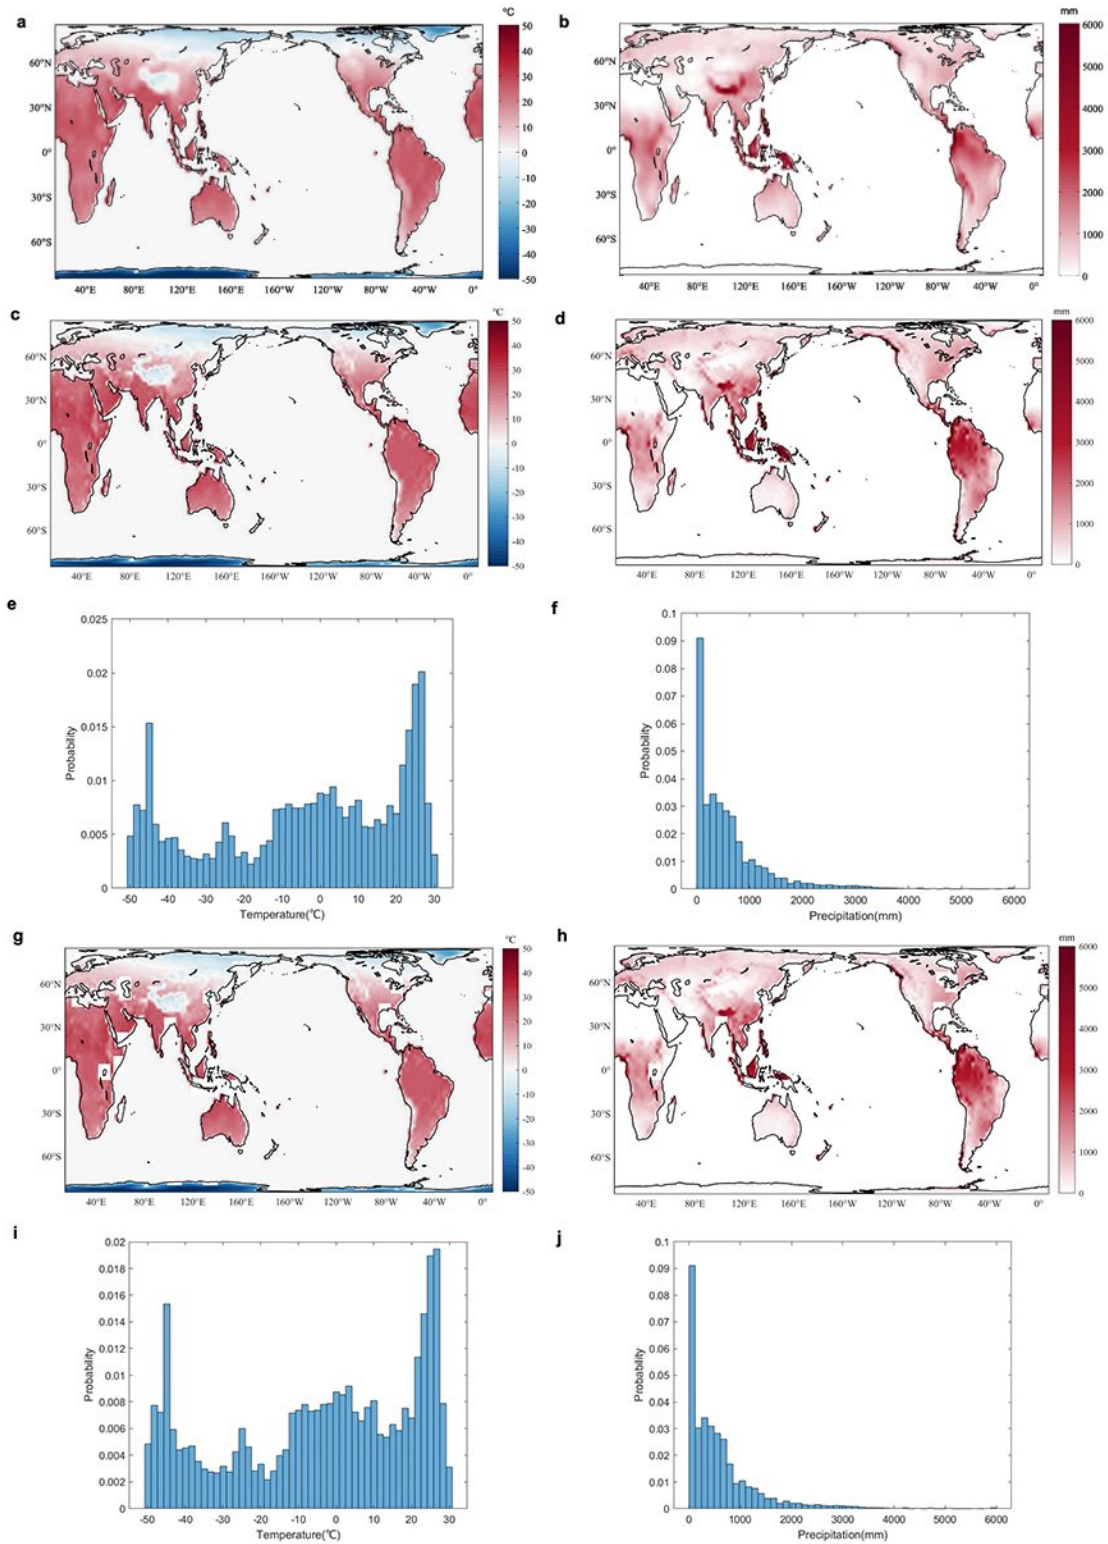

46  
 47 **Fig. S11.** Bias-corrected T and P in 2015 based on ERA5. (a) uncorrected temperature (b)  
 48 uncorrect precipitation (c) corrected temperature (d) corrected precipitation (e) PDF of  
 49 corrected temperature (f) PDF of corrected precipitation (g) ERA5 temperature (h) ERA5  
 50 precipitation (i) PDF of ERA5 temperature (j) PDF of ERA5 precipitation.  
 51

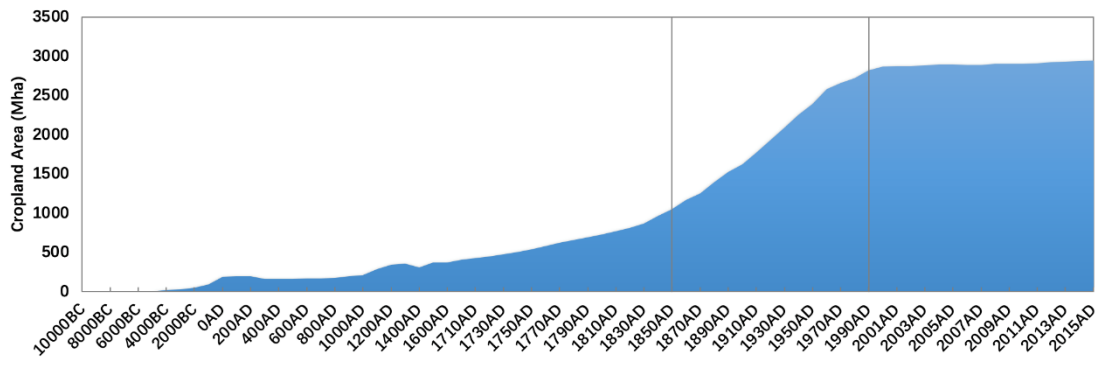

Data from: HYDE

52  
53

**Fig. S12.** Cropland areas from 10000BC to 2015.

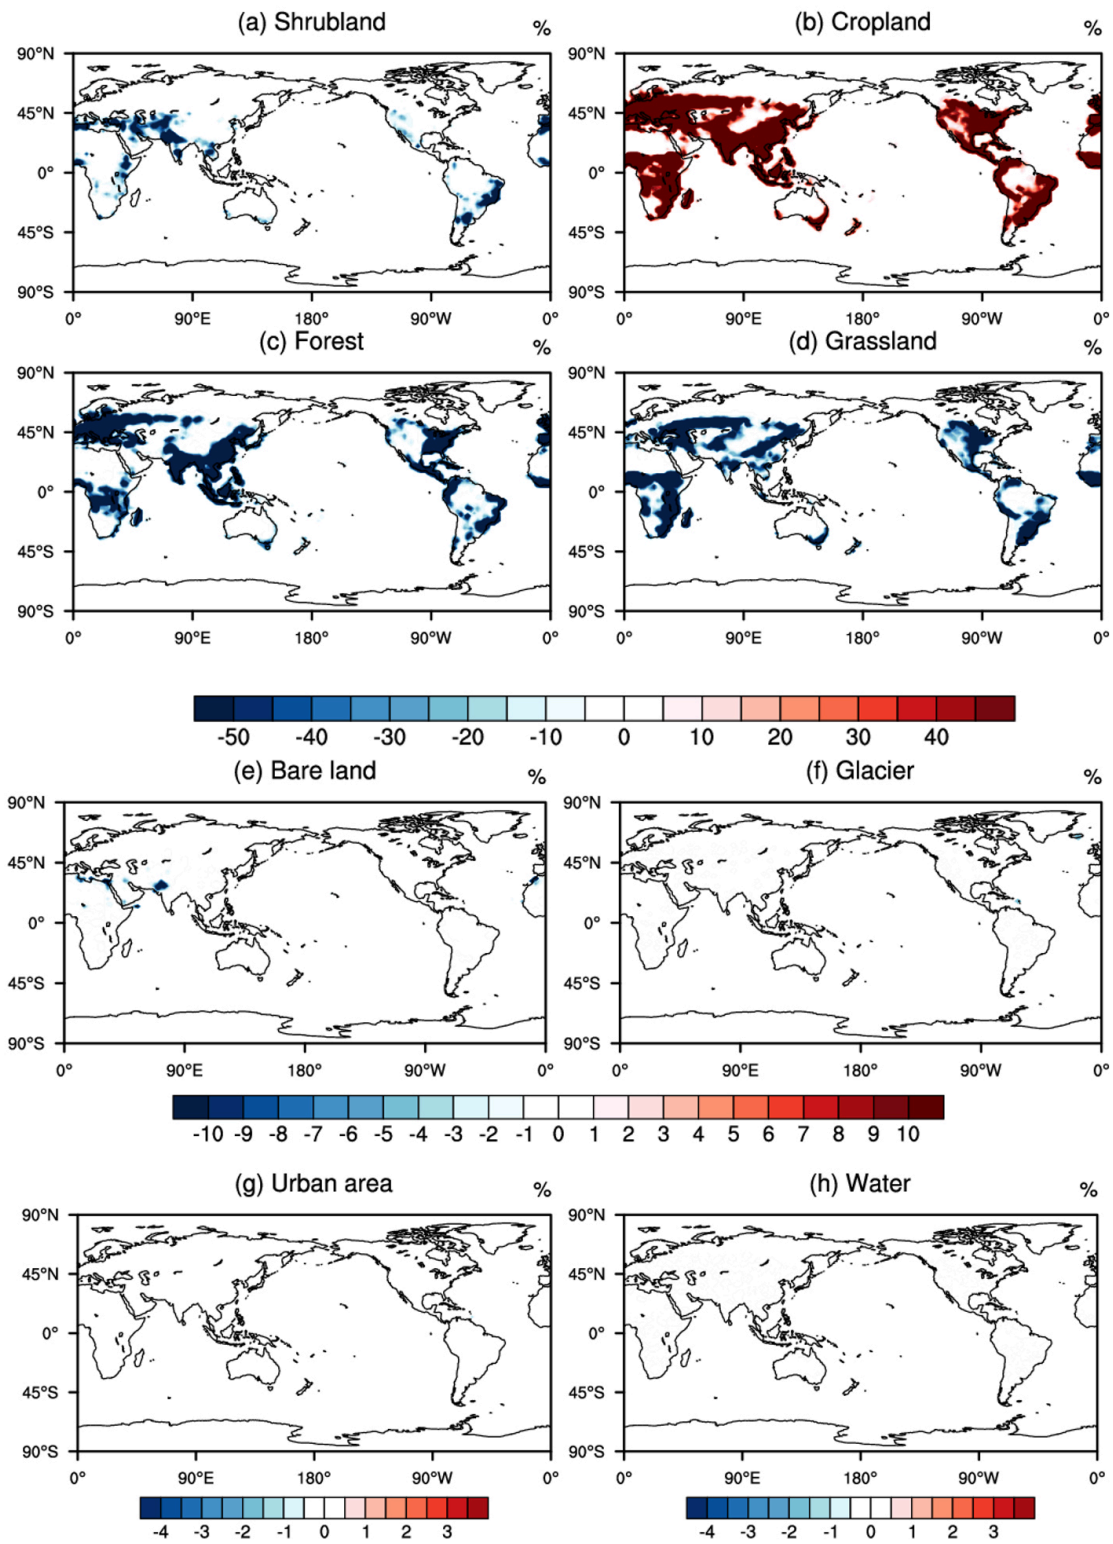

54  
55  
56

**Fig. S13.** Land cover changes caused by cropland expansion/contraction from 10000BC to 2015.

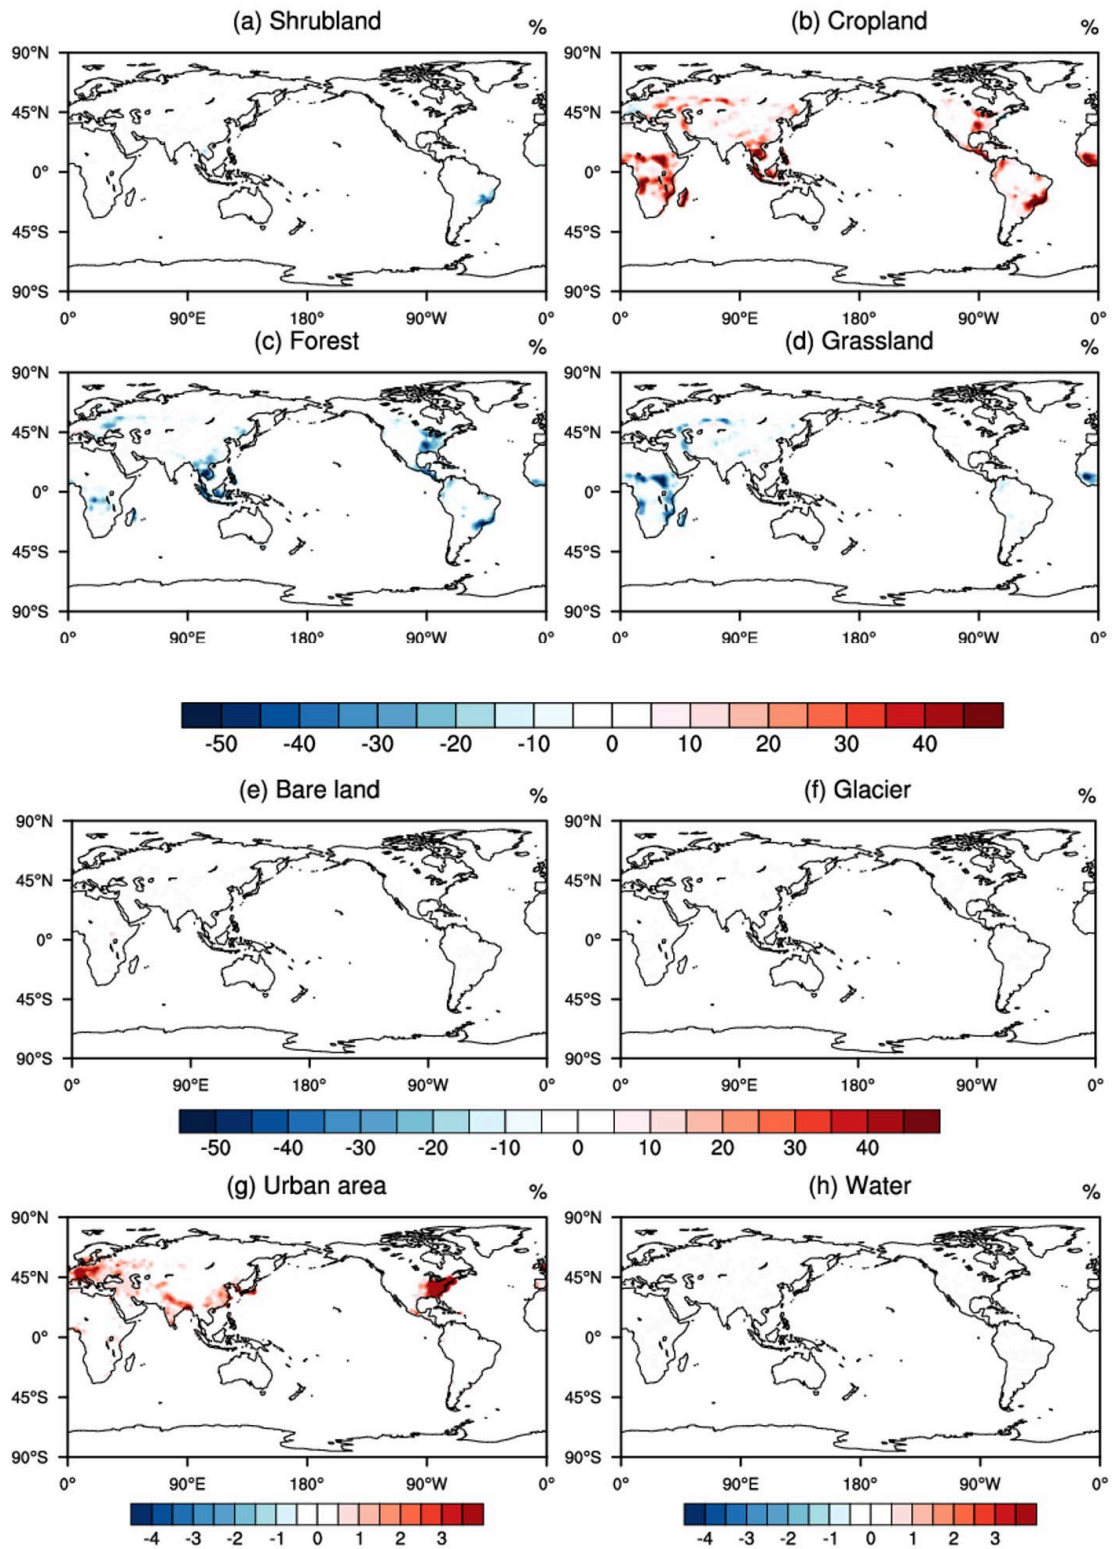

57  
58 Fig. S14. Same as Fig. S2 but for from 1850 to 2015.

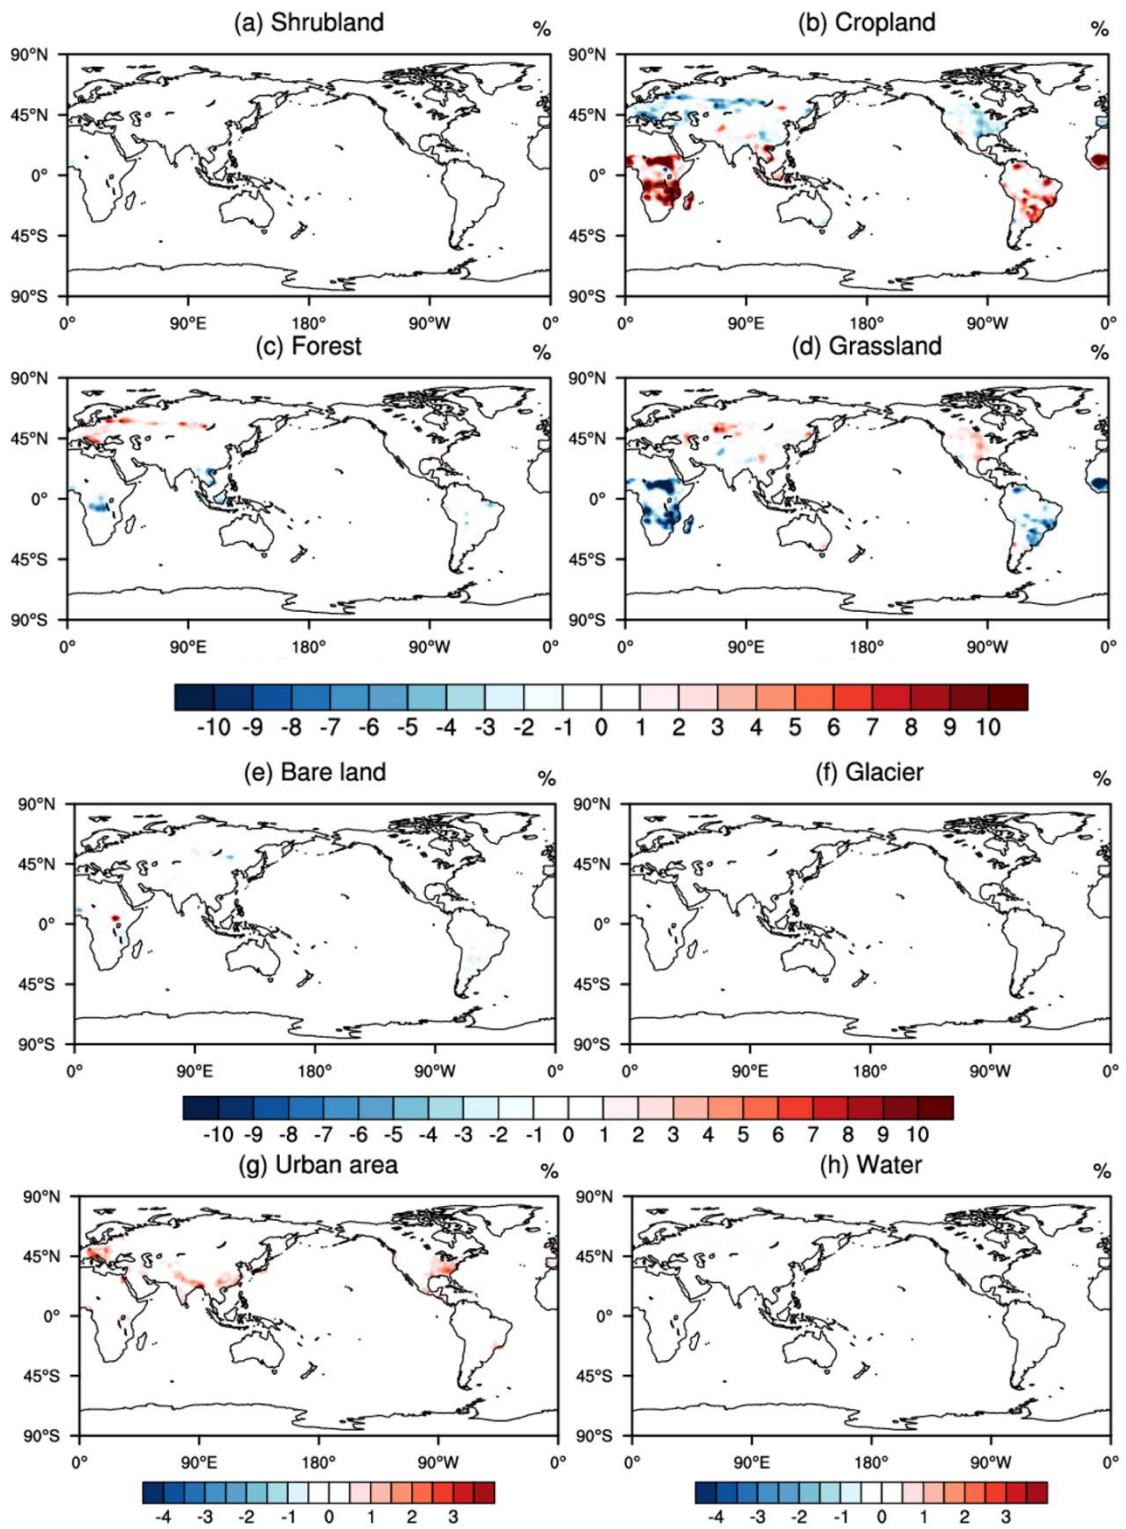

59  
60  
61

Fig. S15. Same as Fig. S2 but for from 1990 to 2015.

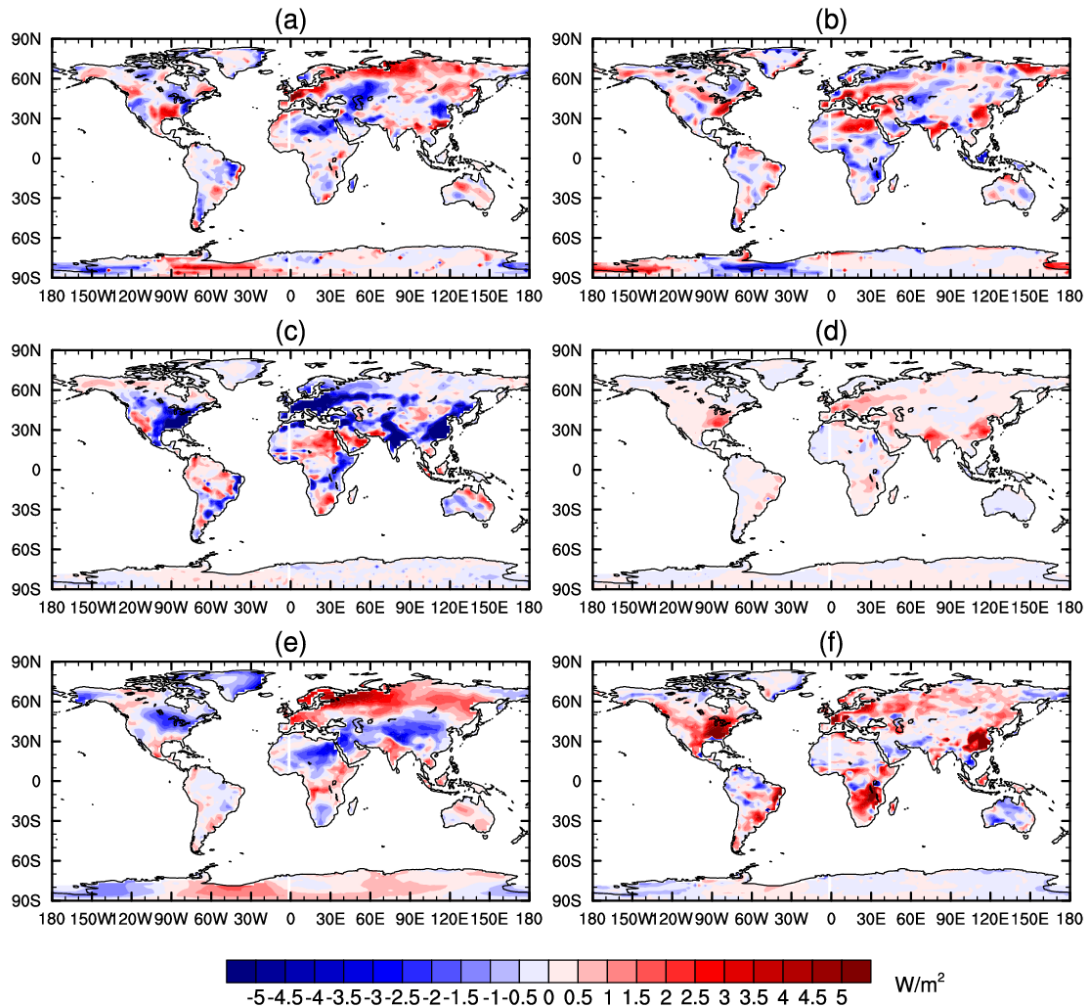

62  
63  
64  
65  
66  
67

**Fig. S16.** Differences between crop2015 and crop10000BC in (a) horizontal temperature advection, (b) adiabatic heating/cooling, (c) surface sensible heat flux, (d) shortwave radiative heating, (e) longwave downwelling flux, and (f) latent heat release plus vertical diffusion. Unit is unified to  $\text{W/m}^2$  by multiplying atmospheric mass at the near-surface and specific heat of air.

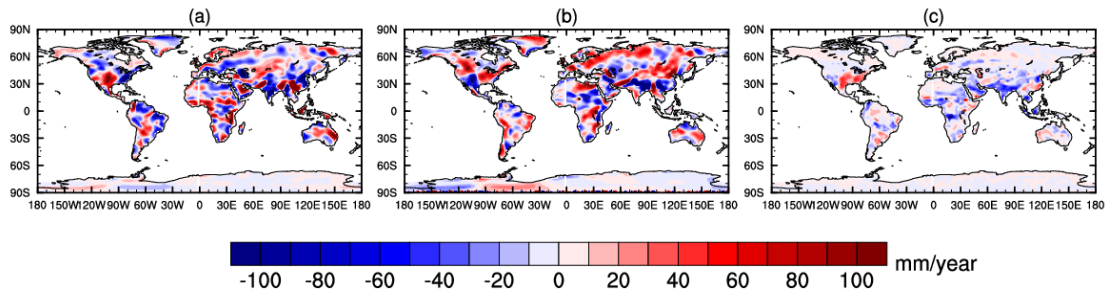

68  
69  
70  
71

**Fig. S17.** Differences between crop2015 and crop10000BC in (a) moisture convergence, (b) moisture advection, and (c) evaporation.



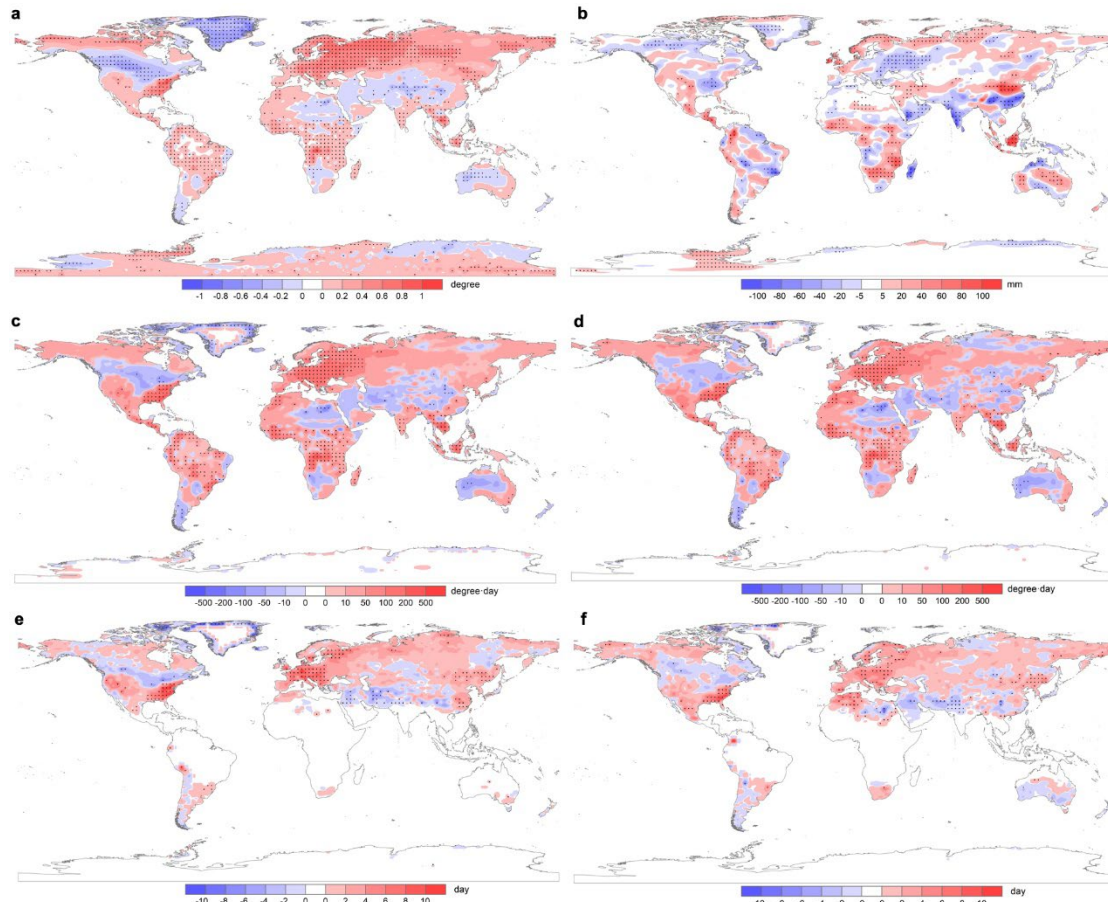

73

74 **Fig. S18.** Temperature and precipitation changes from 1850 to 2015. a, Annual mean

75

temperature. b, Annual mean precipitation. c,  $TS_{t=0}$ . d,  $TS_{t=10}$ . e,  $LGP_{t=5}$ . f,  $LGP_{t=10}$ .

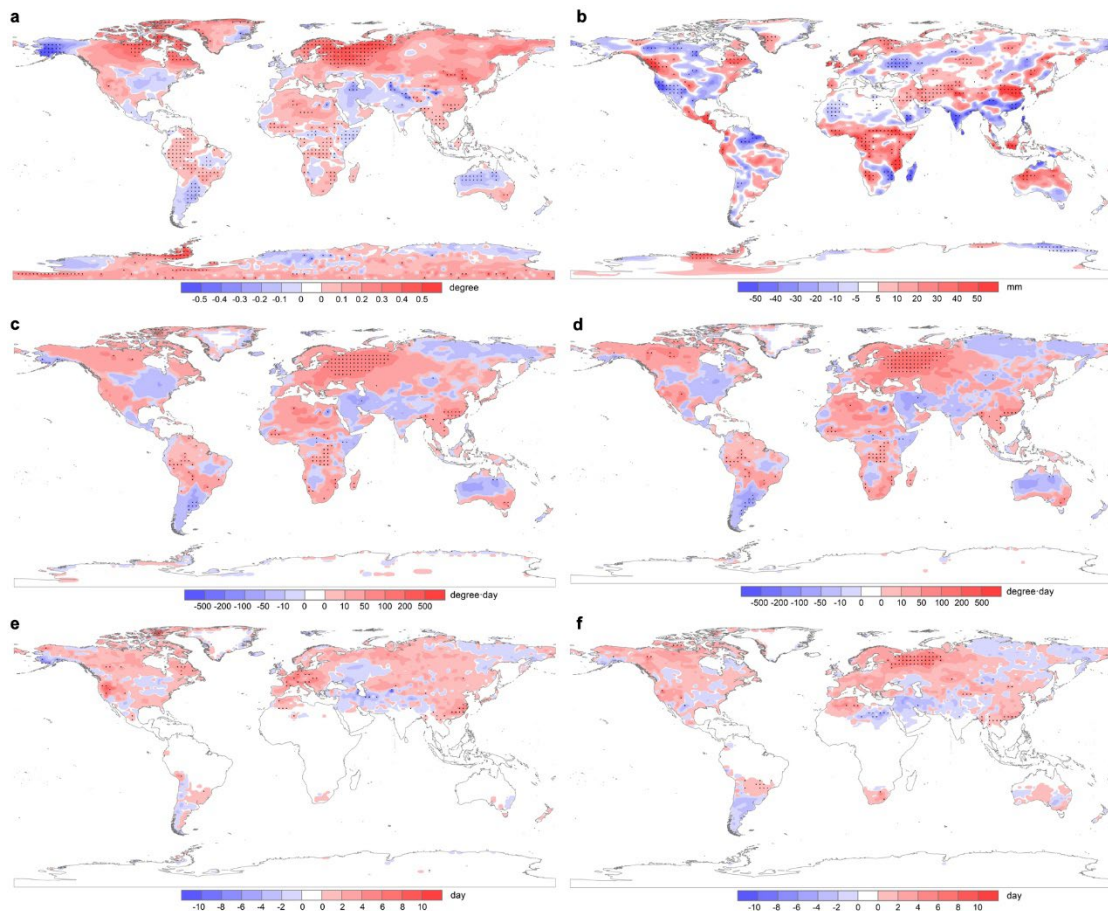

76  
 77 **Fig. S19.** Same as Fig. S7 but for from 1990 to 2015.  
 78

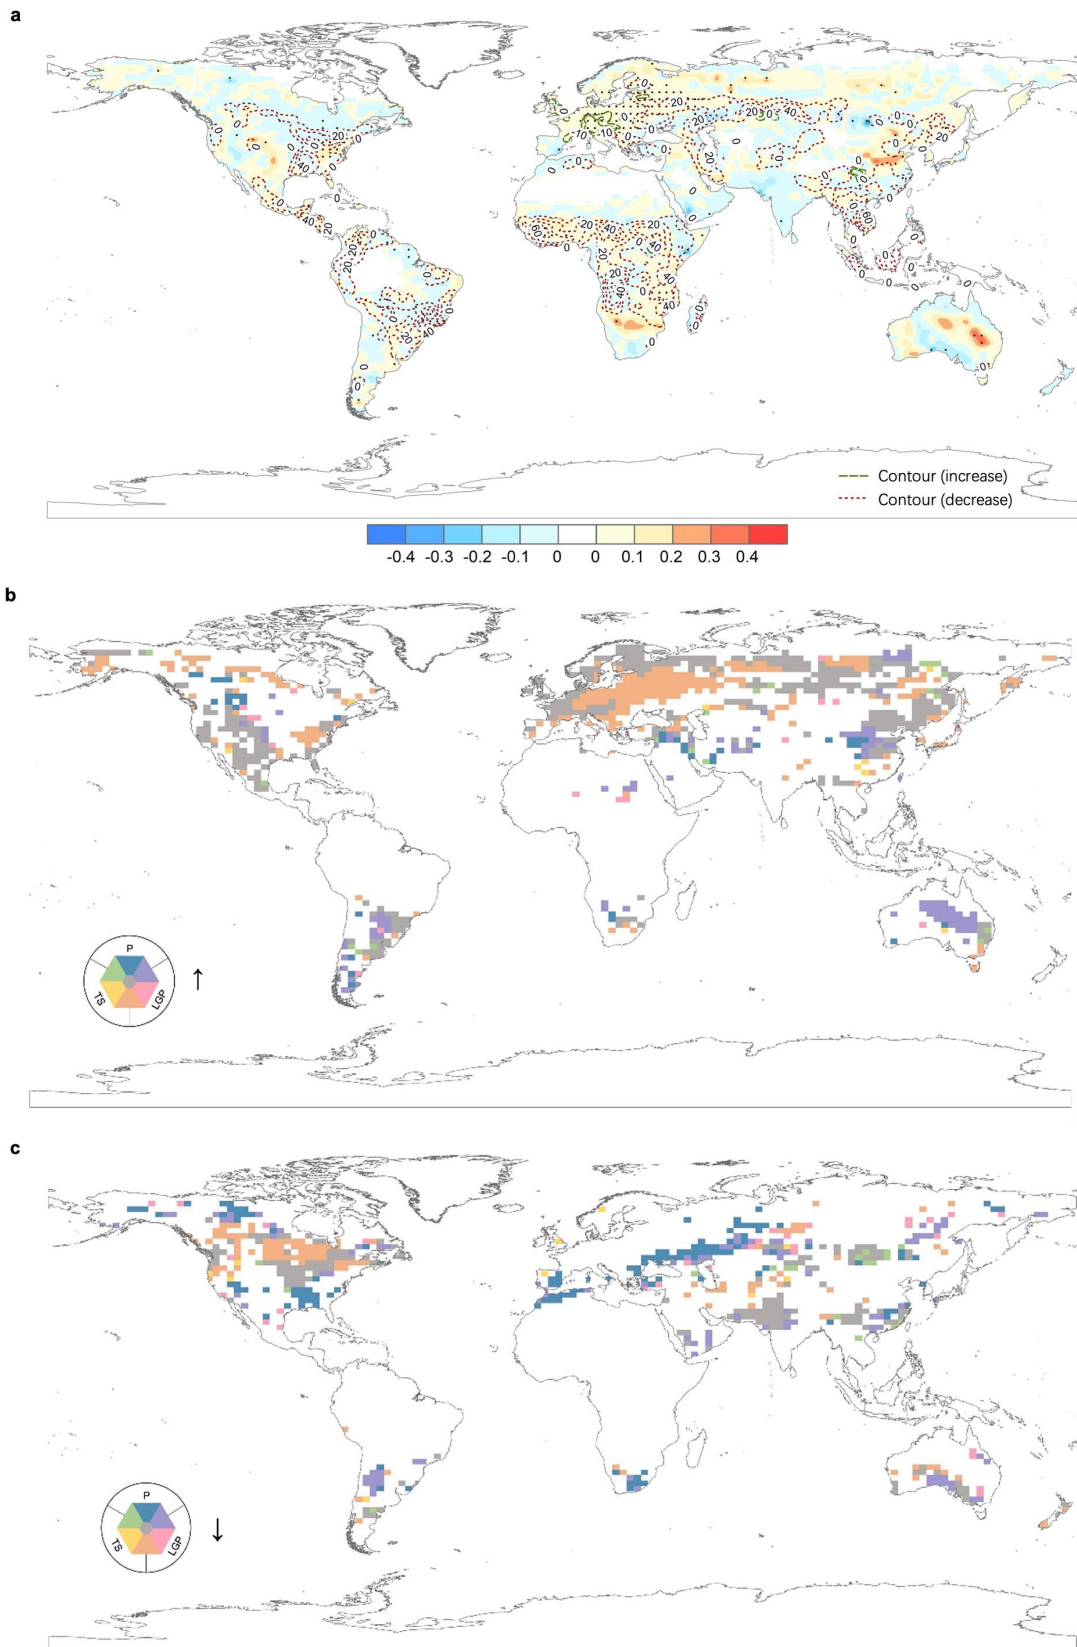

80  
81  
82

**Fig. S20.** Cropping potential changes and causes from 1850 to 2015.

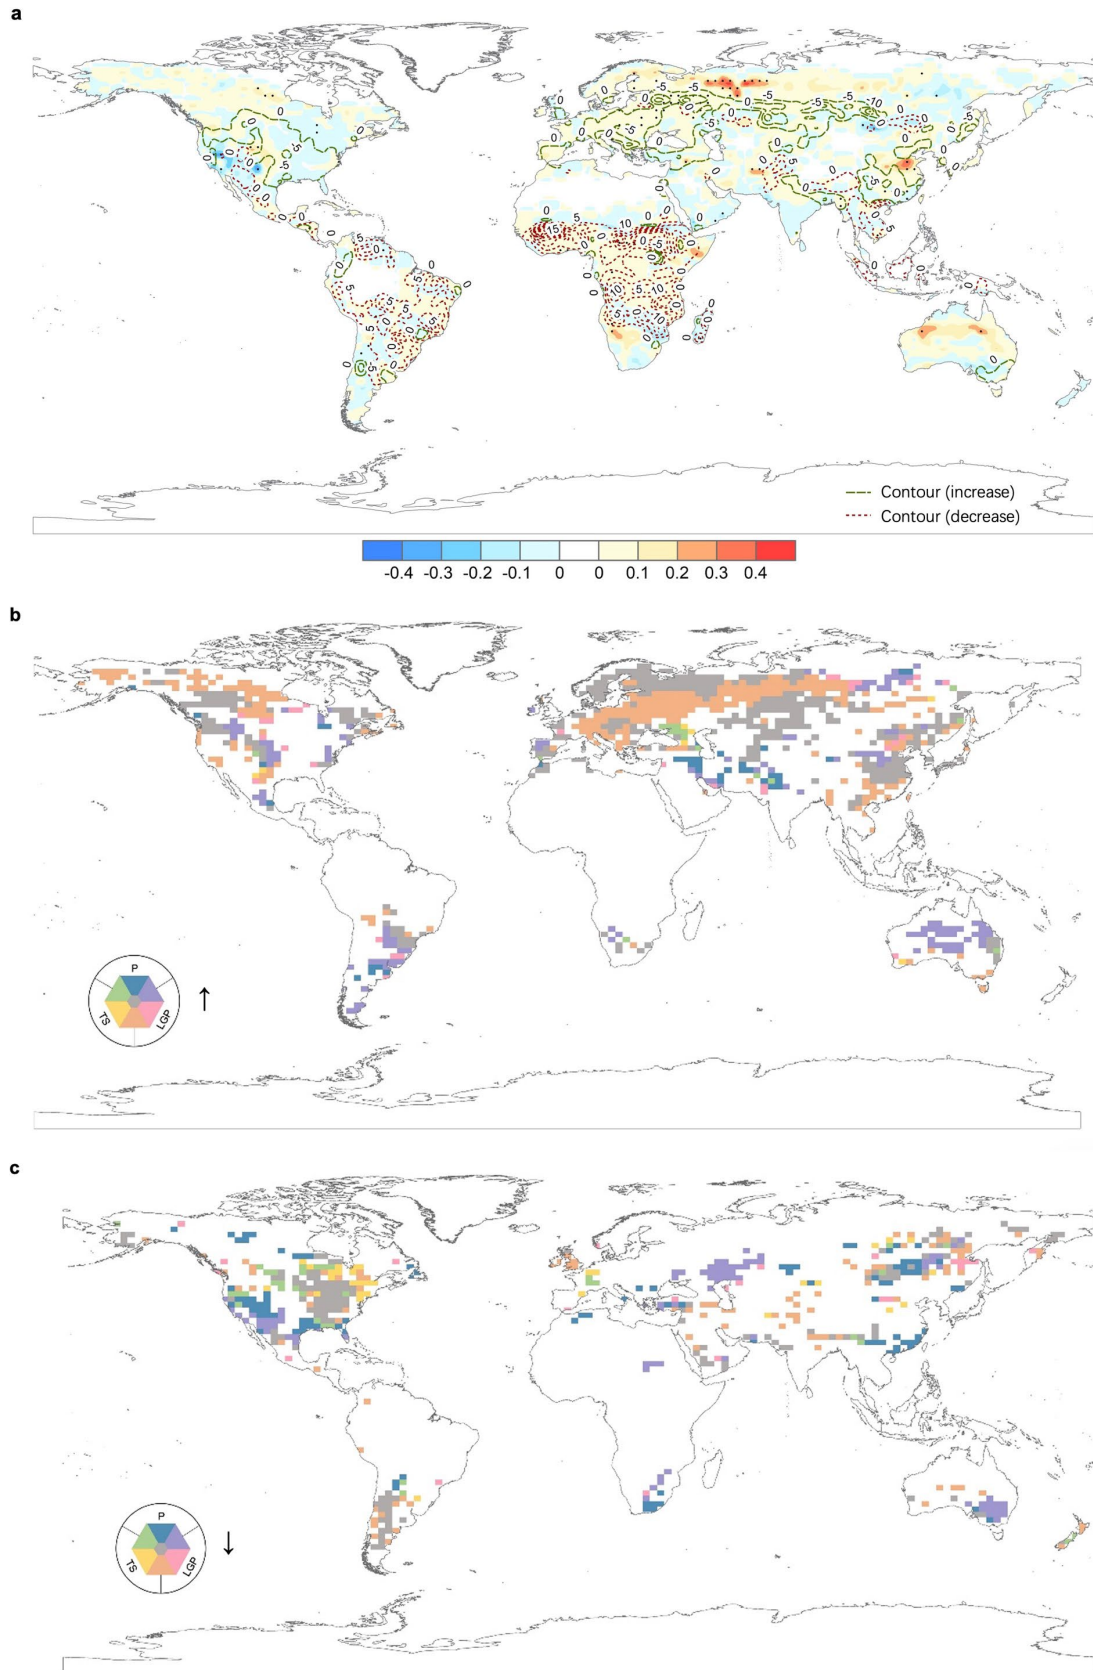

84

85

**Fig. S21.** Cropping potential changes and causes from 1990 to 2015.

86

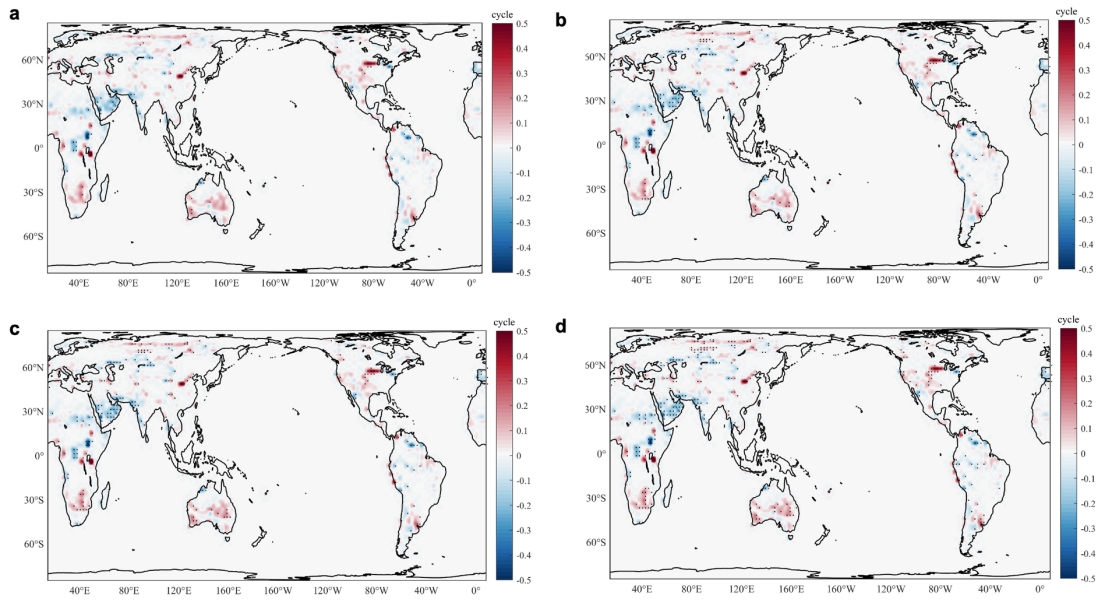

87  
88  
89

**Fig. S22.** Cropping potential changes with (a)95%, (b)90%, (c)85%, (d)80%confidence level from 10000BC to 2015.
